# Supplementary material
Source: MDPI journal article supplement (https://www.mdpi.com/1999-4907/15/5/790)
Supplement: s1 [file s1]

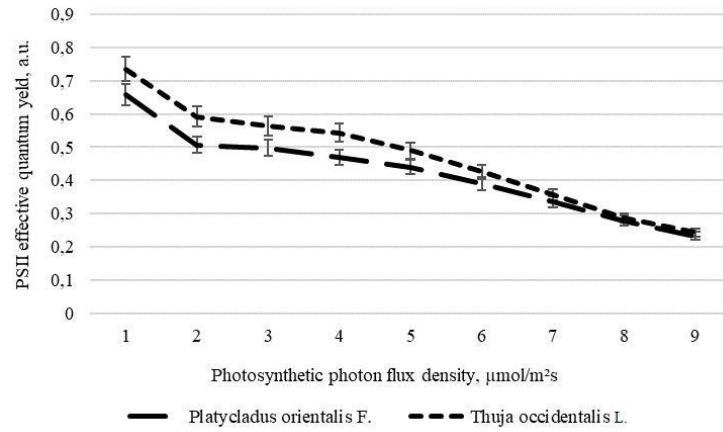

**Figure S1.** PSII effective quantum yield of photosynthesis (YII) of *T. occidentalis* and *P. orientalis* data presented are means  $\pm$  standard error.

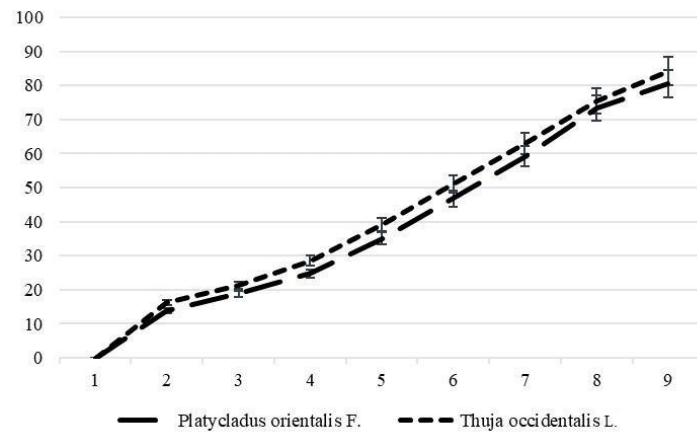

**Figure S2.** ETR dynamic of *T. occidentalis* and *P. orientalis* data presented are means  $\pm$  standard error.

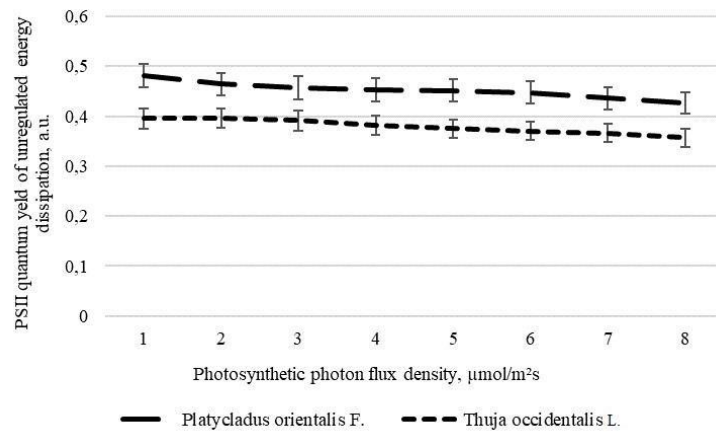

**Figure S3.** PSII quantum yield of nonregulated energy dissipation (Y(NO)) of *T. occidentalis* and *P. orientalis* data presented are means  $\pm$  standard error.

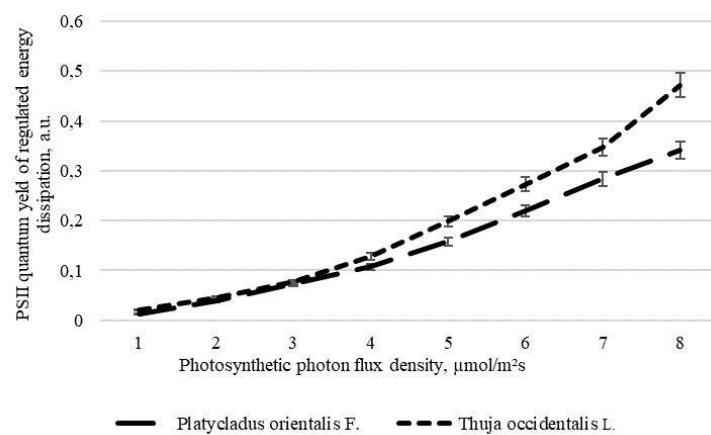

**Figure S4.** PSII quantum yield of regulated energy dissipation (Y(NPQ)) of *T. occidentalis* and *P. orientalis* data presented are means  $\pm$  standard error.

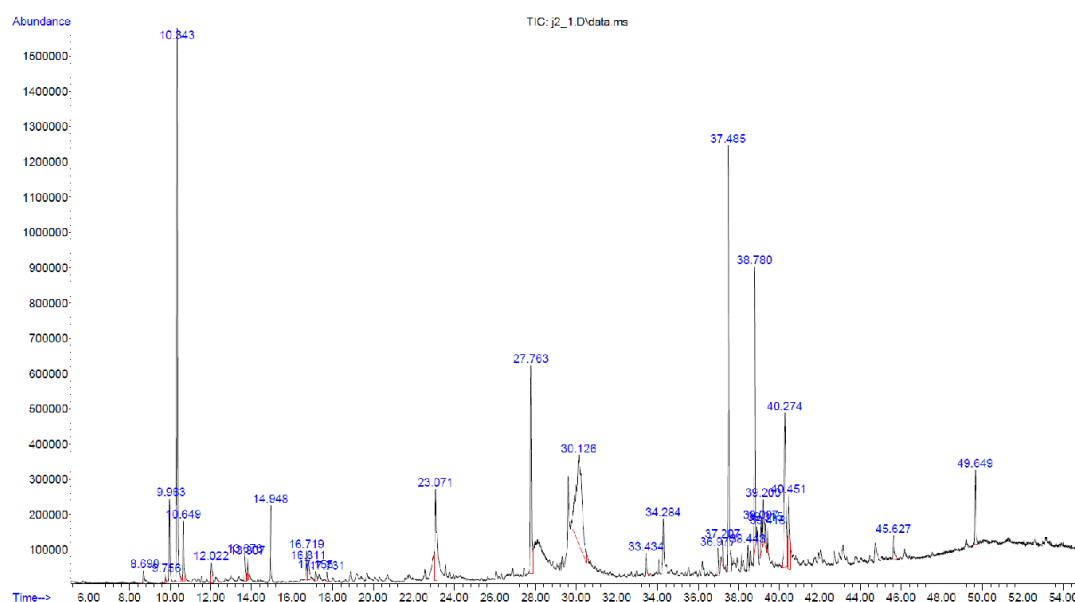

**Figure S5.** Chromatographic profile of *T. occidentalis* leaf extract.

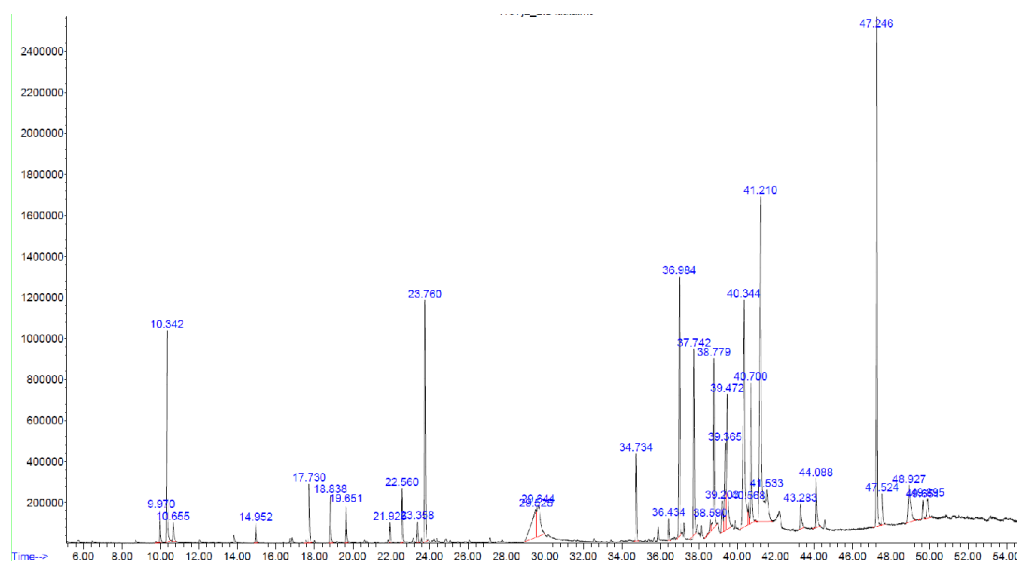

**Figure S6.** Chromatographic profile of *P. orientalis* leaf extract.
